# Supplementary material for: Knowledge is Power? Pap Testing Habits of Female OB/GYNs Compared To Other Female Physicians
Source: Research Square preprint supplement (doi:10.21203/rs.3.rs-1205574/v1), 2022-01-10
Supplement: Supplementary file 1 [file d2525ac12ad271aa2ef83d47.docx]

**Supplementary file 2 - Questionnaire – Part 2/2 – knowledge.**

1. what is the objective of Pap test? ___________

In questions 2 – 9 please refer to the Israeli Society of Obstetrics and Gynecology recommendations.

1. How often should a Pap smear be repeated? ________
2. Is the recommended frequency enough in your opinion?

Yes

No

1. What is the recommended age of first PAP test? _________
2. What is the recommended age of last PAP test? _________
3. What are the different HPV vaccines? ___________
4. What are the HPV types the vaccine protects from? ________
5. What are the recommended ages for HPV vaccination in Israel? ____________
6. What are the names of the vaccinations approved for use in Israel? ________
7. What is the upper age limit for administration of the HPV vaccines? ____________
8. Would you recommend HPV vaccination? ________
9. What are the risk factors for cervical cancer?

- Multiple partners
- Contraceptive pill use
- Intra uterine device use
- Smoking
- Family history of cervical cancer
- Circumcision
- Genetic mutation
